# Supplementary material for: Decision aids for female BRCA mutation carriers: a scoping review protocol
Source: HighWire-hosted journal article supplement (doi:10.1136/bmjopen-2020-045075), 2021-07-01
Supplement: bmjopen-2020-045075supp002_data_supplement.pdf [file bmjopen-2020-045075supp002_data_supplement.pdf]

**Appendix 2: Data Extraction Form****Appendix II: Data Extraction Template for studies on decision aids.**

| <b>Evidence source Details and Characteristics</b>                                                                             |  |
|--------------------------------------------------------------------------------------------------------------------------------|--|
| Author                                                                                                                         |  |
| Year                                                                                                                           |  |
| Title                                                                                                                          |  |
| Country                                                                                                                        |  |
| Aims/Purpose                                                                                                                   |  |
| Study population and sample size                                                                                               |  |
| Concept                                                                                                                        |  |
| Context or Setting                                                                                                             |  |
| Study design                                                                                                                   |  |
| Methodology                                                                                                                    |  |
| <b>Details/Results extracted from source of evidence (in relation to the concept of the scoping review)</b>                    |  |
| Risk management options addressed in decision aid                                                                              |  |
| Format of decision aid (paper, web-based etc.)                                                                                 |  |
| Presentation of risks and benefits in decision aid                                                                             |  |
| Patient & Public Involvement (PPI) in decision aid development                                                                 |  |
| Other features of decision aid                                                                                                 |  |
| Efficacy of decision aid on decision related outcomes (if applicable)                                                          |  |
| Author correspondence<br>(Details of correspondence with study authors for additional information or clarification of queries) |  |
| References<br>(Additional relevant articles cited in reference list of article)                                                |  |

\*Modified from JBI methodology guidance for scoping reviews.
